# Supplementary material
Source: publisher figshare collection journal article supplement (https://acs.figshare.com/ndownloader/files/4241983)
Supplement: Supplementary file 1 [file 4241983]

data_RuBaNaY2ads_publ

_pd_block_id
  2010-10-29T09:59|RUBANAY2ADS|ceak|stadip

_audit_creation_method  "from EXP file using GSAS2CIF"
_audit_creation_date                   2010-10-29T09:59
_audit_author_name                     ceak
_audit_update_record
; 2010-10-29T09:59  Initial CIF as created by GSAS2CIF
;

_refine_ls_shift/su_max                1.52
_refine_ls_shift/su_mean               0.57
_computing_structure_refinement        GSAS
_refine_ls_number_parameters           47
_refine_ls_goodness_of_fit_all         1.04
_refine_ls_number_restraints           0
_refine_ls_matrix_type                 full

_pd_phase_name
    "RuBaNaY twice exchanged, adsorbed NOx"
_cell_length_a                         24.69434(28)
_cell_length_b                         24.69434
_cell_length_c                         24.69434
_cell_angle_alpha                      90.0
_cell_angle_beta                       90.0
_cell_angle_gamma                      90.0
_cell_volume                           15058.9(5)
_symmetry_cell_setting                 cubic
_symmetry_space_group_name_H-M         "F d -3 m"


loop_
      _atom_site_type_symbol
      _atom_site_label
      _atom_site_fract_x
      _atom_site_fract_y
      _atom_site_fract_z
      _atom_site_occupancy
      _atom_site_thermal_displace_type
      _atom_site_U_iso_or_equiv
      _atom_site_symmetry_multiplicity
O 
O1      0.17268(22)  0.17268(22)  0.96332(29)  1.0        Uiso   0.0112(28)   96
O 
O2      0.17879(22)  0.17879(22)  0.32074(27)  1.0        Uiso   0.0113(31)   96
O 
O3      0.25087(23)  0.25087(23)  0.14193(32)  1.0        Uiso   0.0185(32)   96
O 
O4      0.10426(20) -0.10426(20)  0.0          1.0        Uiso   0.018(4)     96
Si
T1      0.94742(13)  0.12732(13)  0.03587(15)  1.0        Uiso   0.0146(8)   192
Ba
sii*    0.25305(13)  0.25305(13)  0.25305(13)  0.2815(30) Uiso   0.0225(27)   32
Ba
SI'     0.07658(22)  0.07658(22)  0.07658(22)  0.2095(24) Uiso   0.023(4)     32
Na
SIIIna  0.375        0.375        0.481(5)     0.0409(27) Uiso   0.02(4)      48
O 
OW3     0.4319(8)    0.4319(8)    0.4047(8)    0.038(2)   Uiso   0.08(19)     96
Na
sv      0.5          0.5          0.5          0.063(4)   Uiso   0.05(5)      16
Ru
ru      0.0          0.0          0.0          0.098(4)   Uiso   0.028(16)    16
O 
ow23    0.307(8)     0.307(8)     0.249(5)     0.0426(27) Uiso   0.04(10)     96
O 
ow53    0.435(7)     0.435(7)     0.547(3)     0.064(4)   Uiso   0.07(11)     96
Na
sii     0.23937      0.23937      0.23937      0.063(8)   Uiso   0.01724      32
N 
N18     0.48853      0.34135      0.46973      0.02       Uiso   0.01(6)     192
N 
N19     0.47165      0.40436      0.43207      0.02       Uiso   0.01(6)     192
N 
N20     0.4482       0.31974      0.47575      0.02       Uiso   0.01(6)     192
N 
N21     0.42411      0.41025      0.42168      0.02       Uiso   0.01(6)     192
N 
N22     0.50987      0.43323      0.42168      0.02       Uiso   0.01(6)     192
Ba
sii'ba  0.18459(20)  0.18459(20)  0.18459(20)  0.2095(29) Uiso   0.026(5)     32
 
# If you change Z, be sure to change all 3 of the following
_chemical_formula_sum                  "Ba0.12 N0.10 Na0.03 O2.08 Ru0.01 Si"
_chemical_formula_weight               80.25
_cell_formula_units_Z                  192

_pd_spec_shape                    'cylinder'

loop_ _atom_type_symbol
      _atom_type_number_in_cell
      _atom_type_scat_dispersion_real
      _atom_type_scat_dispersion_imag
      _atom_type_scat_Cromer_Mann_a1
      _atom_type_scat_Cromer_Mann_a2
      _atom_type_scat_Cromer_Mann_a3
      _atom_type_scat_Cromer_Mann_a4
      _atom_type_scat_Cromer_Mann_b1
      _atom_type_scat_Cromer_Mann_b2
      _atom_type_scat_Cromer_Mann_b3
      _atom_type_scat_Cromer_Mann_b4
      _atom_type_scat_Cromer_Mann_c
      _atom_type_scat_source
  O         400.069    0.000    0.000
 3.04850 13.2771 2.28680 5.70110 1.54630 0.32390 0.86700 32.9089 0.25080 
  International_Tables_Vol_C
  Si        192.0    0.000    0.000
 6.29150 2.43860 3.03530 32.3337 1.98910 0.67850 1.54100 81.6937 1.14070 
  International_Tables_Vol_C
  Ba        22.414    0.000    0.000
 20.3361 3.21600 19.2970 0.27560 10.8880 20.2073 2.69590 167.202 2.77310 
  International_Tables_Vol_C
  Na         4.967    0.000    0.000
 4.76260 3.28500 3.17360 8.84220 1.26740 0.31360 1.11280 129.424 0.67600 
  International_Tables_Vol_C
  Ru         1.562    0.000    0.000
 19.2674 0.80852 12.9182 8.43467 4.86337 24.7997 1.56756 94.2928 5.37874 
  International_Tables_Vol_C
  N         18.955    0.000    0.000
 12.2126 0.00570 3.13220 9.89330 2.01250 28.9975 1.16630 0.58260 -11.529 
  International_Tables_Vol_C
_diffrn_radiation_probe                x-ray
_diffrn_radiation_polarisn_ratio       0.0
_diffrn_radiation_wavelength           1.5405
_diffrn_radiation_type                 K\a~1~
_pd_proc_ls_prof_R_factor              0.0508
_pd_proc_ls_prof_wR_factor             0.0692
_pd_proc_ls_prof_wR_expected           0.0379
_refine_ls_R_Fsqd_factor               0.1266

_pd_proc_ls_background_function
;   GSAS Background function number 1 with 14 terms.
 Shifted Chebyshev function of 1st kind
      1:    591.789     2:   -126.926     3:    130.022     4:   -48.1862    
      5:    19.6190     6:   -57.0250     7:    62.1907     8:   -35.0458    
      9:    2.61352    10:    8.49045    11:  -0.750242    12:   -5.50851    
     13:    3.69802    14:   -3.11119    
;

_exptl_absorpt_process_details
;   GSAS Absorption/surface roughness correction: function number 0
 Debye-Scherrer absorption correction
Term (= MU.r/wave) =      3.5000    
Correction is calculated and not refined.
;

_pd_proc_ls_profile_function
;
 CW Profile function number 3 with  19 terms
 Pseudovoigt profile coefficients as parameterized in
 P. Thompson, D.E. Cox & J.B. Hastings (1987). J. Appl. Cryst.,20,79-83.
 Asymmetry correction of L.W. Finger, D.E. Cox & A. P. Jephcoat (1994).
 J. Appl. Cryst.,27,892-900.
 #1(GU)   =    4.998 #2(GV)   =   -1.189 #3(GW)   =   -0.161
 #4(GP)   =   12.194 #5(LX)   =    1.970 #6(LY)   =   37.194
 #7(S/L)  =   0.0340 #8(H/L)  =   0.0205
 #9(trns) =     0.00 #10(shft)=   0.0000
 #11(stec)=     0.00 #12(ptec)=     0.00 #13(sfec)=     0.00
 #14(L11) =   -0.022 #15(L22) =    0.077 #16(L33) =   -0.063
 #17(L12) =    0.000 #18(L13) =    0.000 #19(L23) =    0.000
 Peak tails are ignored  where the intensity is below 0.0010 times the peak
   Aniso. broadening axis   0.0   0.0   1.0
;
_pd_proc_ls_peak_cutoff 0.00100
_pd_proc_info_datetime                 2010-10-29T09:59:31
_pd_calc_method                        "Rietveld Refinement"

_pd_meas_2theta_range_min              3.01
_pd_meas_2theta_range_max              89.9
_pd_meas_2theta_range_inc              0.01
_pd_proc_2theta_range_min              2.99507
_pd_proc_2theta_range_max              89.88507
_pd_proc_2theta_range_inc              0.01

_reflns_number_total                   328
_reflns_limit_h_min                    1
_reflns_limit_h_max                    23
_reflns_limit_k_min                    0
_reflns_limit_k_max                    16
_reflns_limit_l_min                    0
_reflns_limit_l_max                    13
_reflns_d_resolution_high              1.091
_reflns_d_resolution_low               14.257
#--eof--eof--eof--eof--eof--eof--eof--eof--eof--eof--eof--eof--eof--eof--eof--#
